# Supplementary material
Source: PubMed Central journal article supplement (PMC11160505)
Supplement: djae050_supplementary_data.pdf [file djae050_supplementary_data.pdf]

# Prediagnostic evaluation of multicancer detection tests:

## Design and analysis considerations

### Supplementary Methods

This section calculates the sample size based on previously developed formulas (1).

*Number of cases.* For cancer  $j$ , the number of cases,  $n_{1j}$ , and number of positive cases,  $x_{1j}$ , approximately solve the Clopper-Pearson (2) equation for a 0.3% lower bound,

$CDF[\text{Binomial}(n_{1j}, TPR_{LOW}), x_{1j}] = 0.997$ , where  $CDF$  is the cumulative distribution function.

The standard target of  $TPR_{LOW} = 0.70$  is satisfied by 70 cases with 59 positives because

$CDF[\text{Binomial}(70, 0.70), 59] = 0.998$ . The Scenario 1 sample size tradeoff target of  $TPR_{LOW} =$

0.20 is satisfied by 12 cases with 7 positives because  $CDF[\text{Binomial}(12, 0.20), 7] = 0.999$ . The

Scenario 2 sample size tradeoff target of  $TPR_{LOW} = 0.50$  is satisfied by 12 cases with 10 positives because  $CDF[\text{Binomial}(12, 0.50), 10] = 0.997$ .

*Number of controls.* The required number of controls,  $n_0$ , and number of positive controls,  $x_0$ , approximately solve the Clopper-Pearson equation for a 97.5% upper bound,

$CDF[\text{Binomial}(n_0, FPR_{UPP}), x_0] = 0.025$ . The standard target  $FPR_{UPP} = 0.03$  is satisfied by 300

controls with 3 positives because  $CDF[\text{Binomial}(300, 0.03), 3] = 0.02$ . The sample size tradeoff

target  $FPR_{UPP} = 0.0005$  is satisfied by 7500 controls with 0 positives because

$CDF[\text{Binomial}(7500, 0.0005), 0] = 0.023$ .

*Number of specimen collections.* The sample size of  $N$  specimen collections with  $n_{1j}$  cases approximately solves the Clopper-Pearson equation for a 95% upper bound,  $CDF(\text{Binomial}(N, p_j), n_{1j}) = 0.05$ , where  $j$  corresponds to the rarest cancer. For the standard method with a target of 70 cases the sample size is 720,000 because  $CDF[\text{Binomial}(720,000, 0.00012), 70] = 0.04$ . For the sample size tradeoff method with a target of 12 cases, the sample size is 163000 because  $CDF[\text{Binomial}(163,000, 0.00012), 12] = 0.047$ .

## References

1. Baker SG and Kramer BS. Simple methods for evaluating 4 types of biomarkers: surrogate endpoint, prognostic, predictive, and cancer screening. *Biomarker Insights*. 2020; 15:1-8.
2. Clopper, CJ, Pearson ES. The use of confidence or fiducial limits illustrated in the case of the binomial. *Biometrika*. 1934; 26: 404–416.
